# Supplementary material for: NDI-BODIPY-graphene oxide nanosized photocatalysts for LED irradiated organic synthesis
Source: Royal Society of Chemistry journal article supplement (doi:10.1039/d4nj03634d), 2024-11-15
Supplement: d4nj03634d1.pdf [file d4nj03634d1.pdf]

# NDI-BODIPY-Graphene Oxide Nanosized Photocatalysts for LED Irradiated Organic Synthesis

Hande Eserci Gürbüz<sup>a</sup>, Ezel Öztürk Gündüz<sup>a</sup>, Ümmügülsüm Büyükpolat<sup>a</sup>, Elif Okutan<sup>a\*</sup>

<sup>a</sup> Department of Chemistry, Faculty of Science, Gebze Technical University, Gebze, Kocaeli, Türkiye

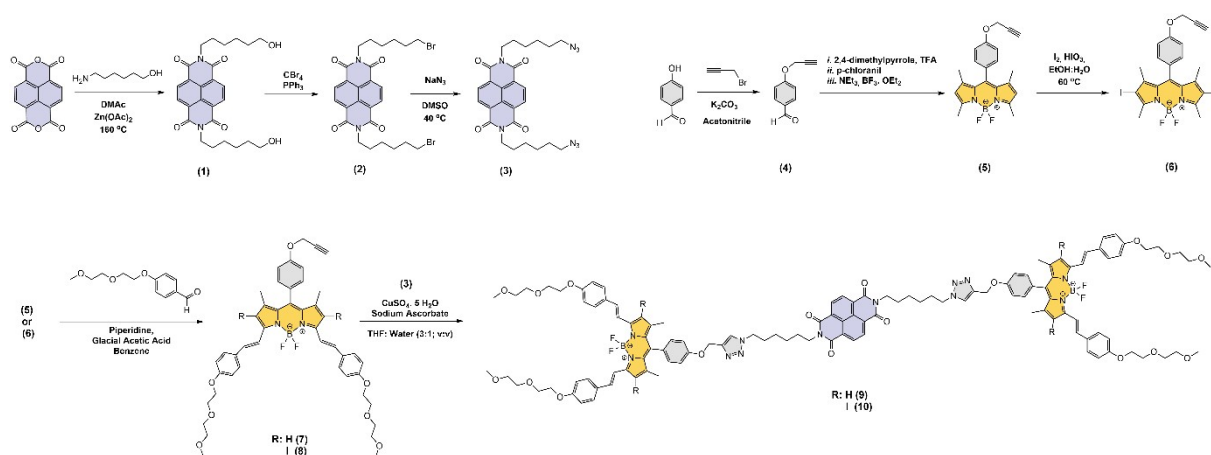

Scheme S1: Synthetic route of compounds 1-10.

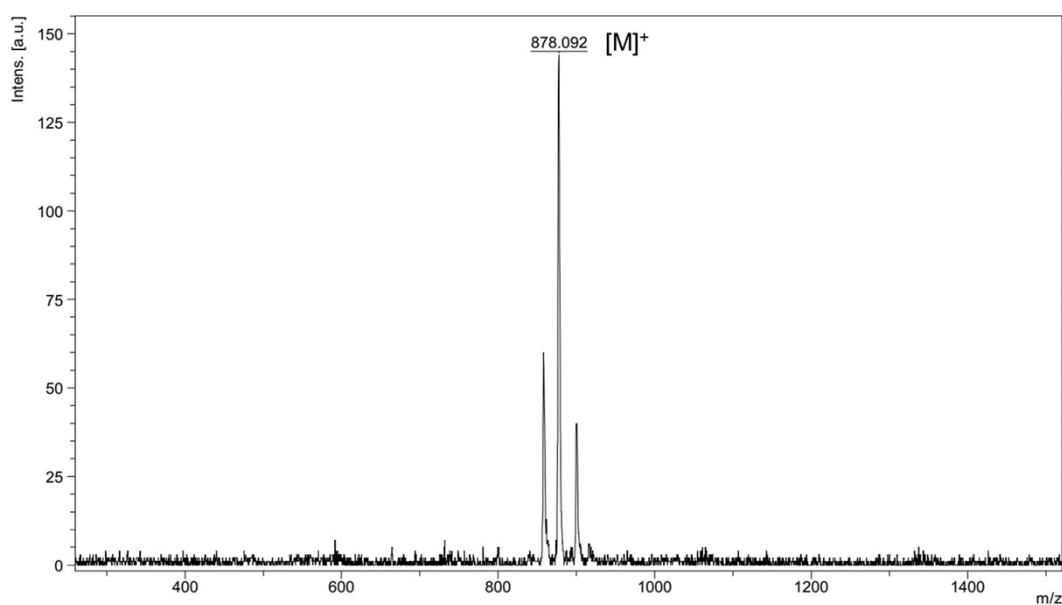

Fig. S1 MALDI-MS spectrum of compound 7.

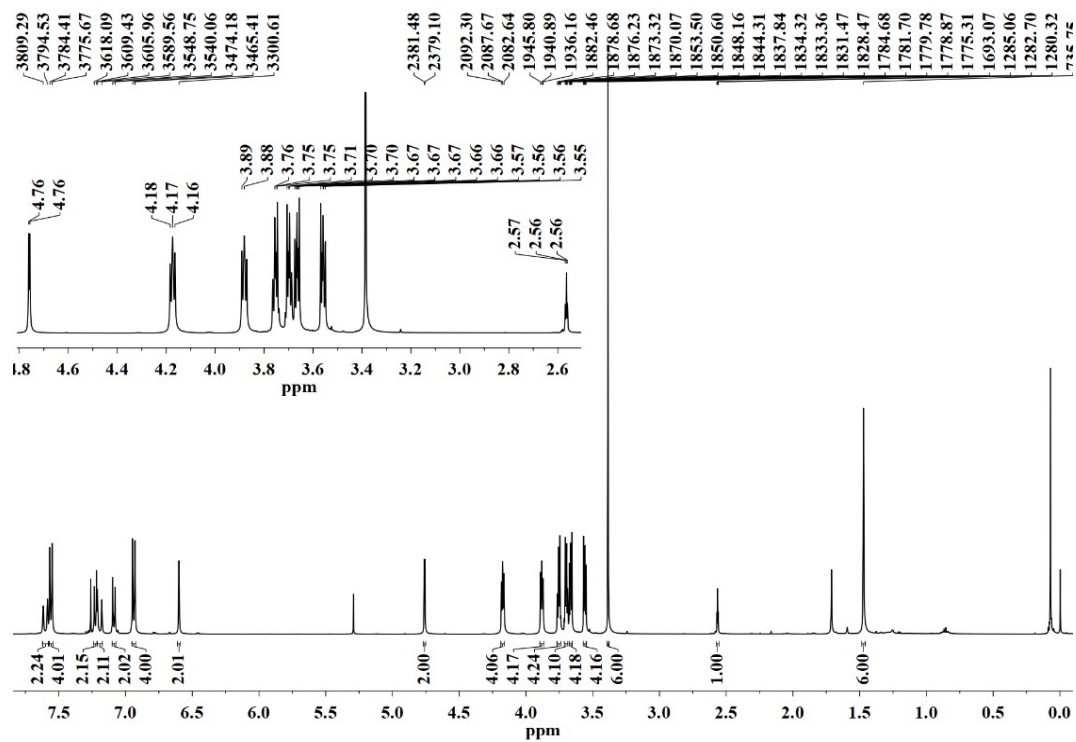

Fig. S2  $^1\text{H}$  NMR spectrum of compound 7.

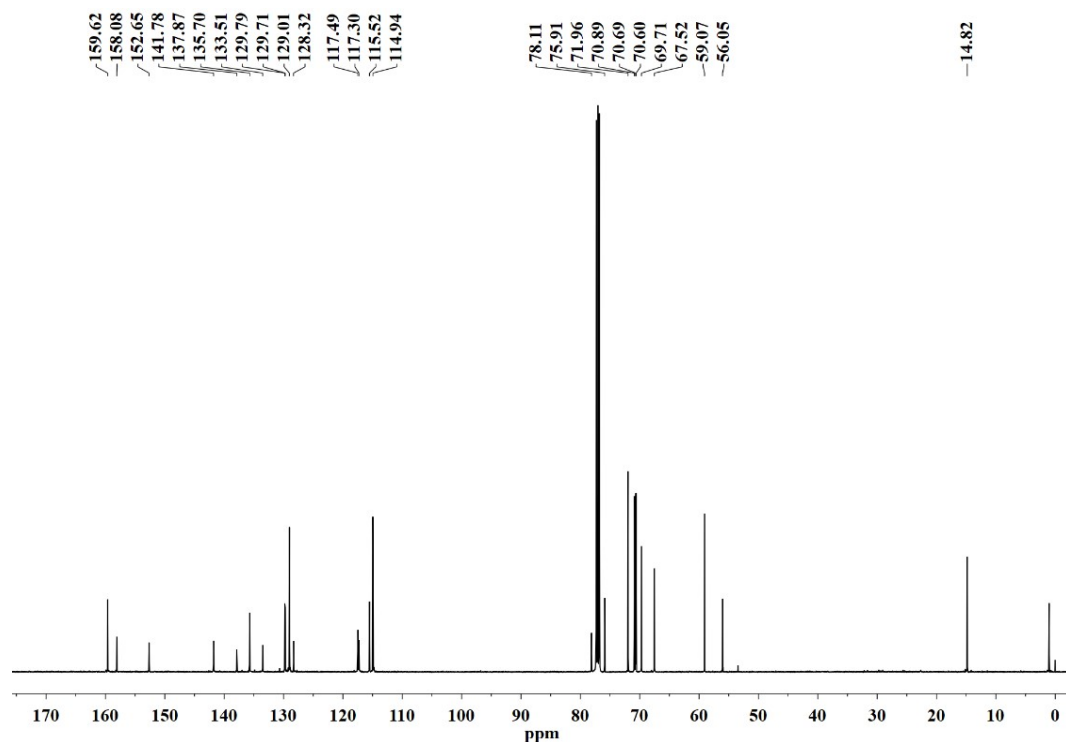

Fig. S3  $^{13}\text{C}$  NMR spectrum of compound 7.

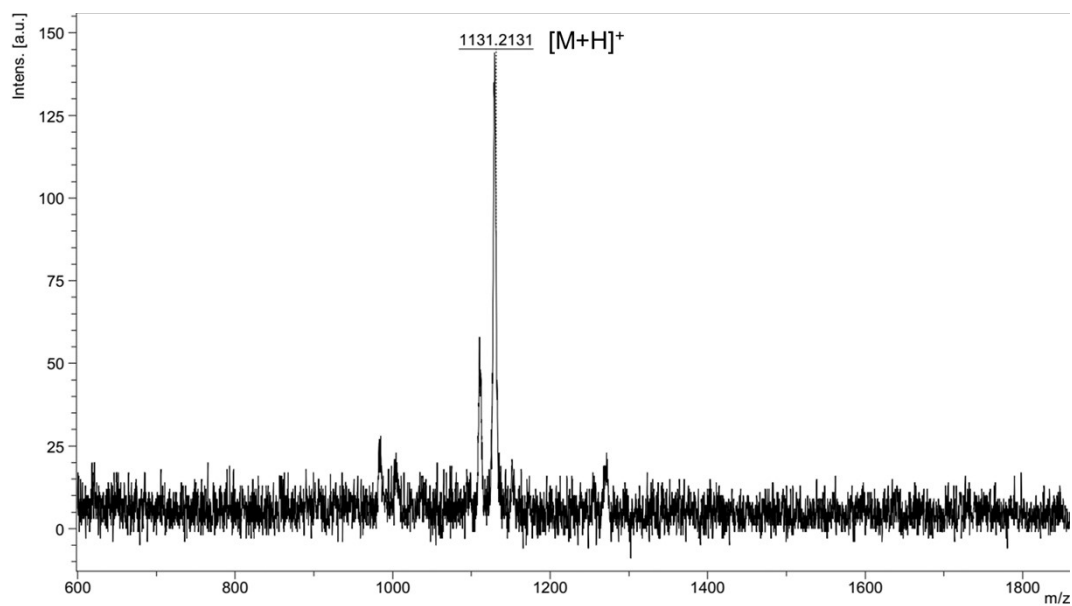

Fig. S4 MALDI-MS spectrum of compound **8**.

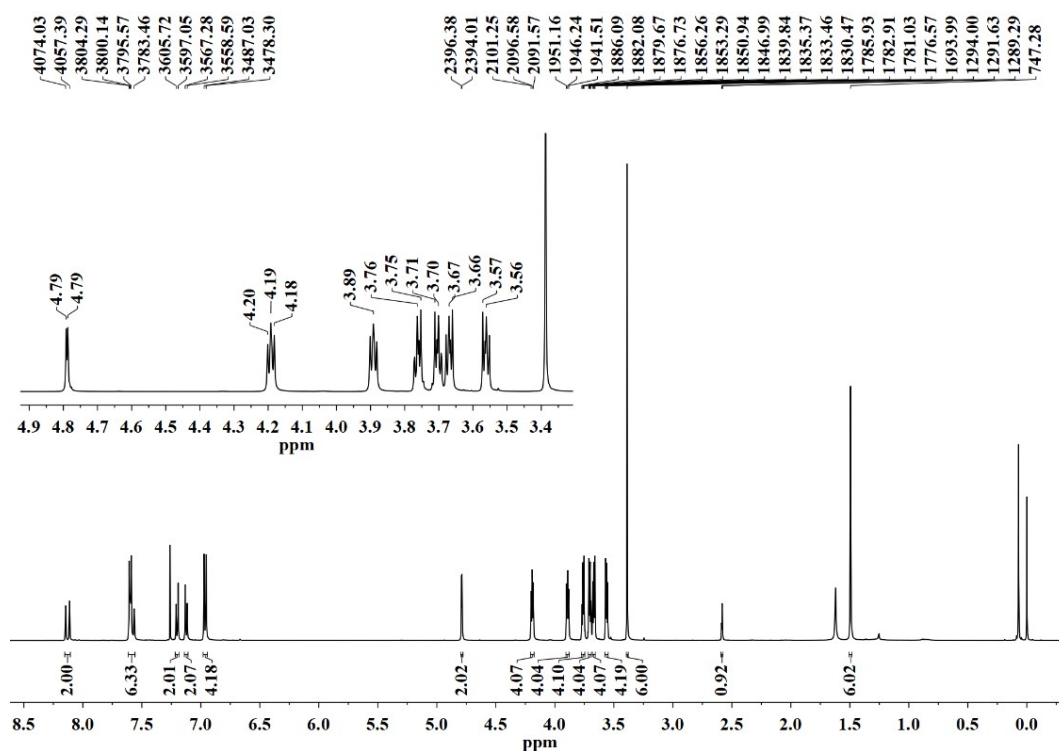

Fig. S: <sup>1</sup>H NMR spectrum of compound **8**.

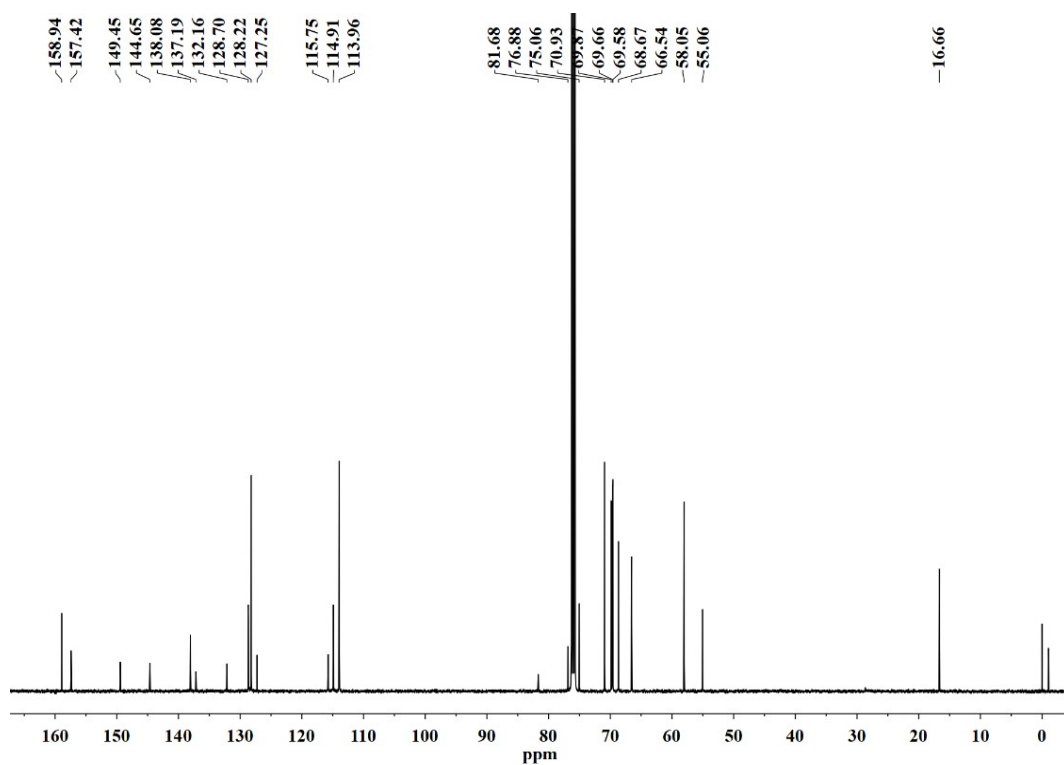

Fig. S6  $^{13}\text{C}$  NMR spectrum of compound 8.

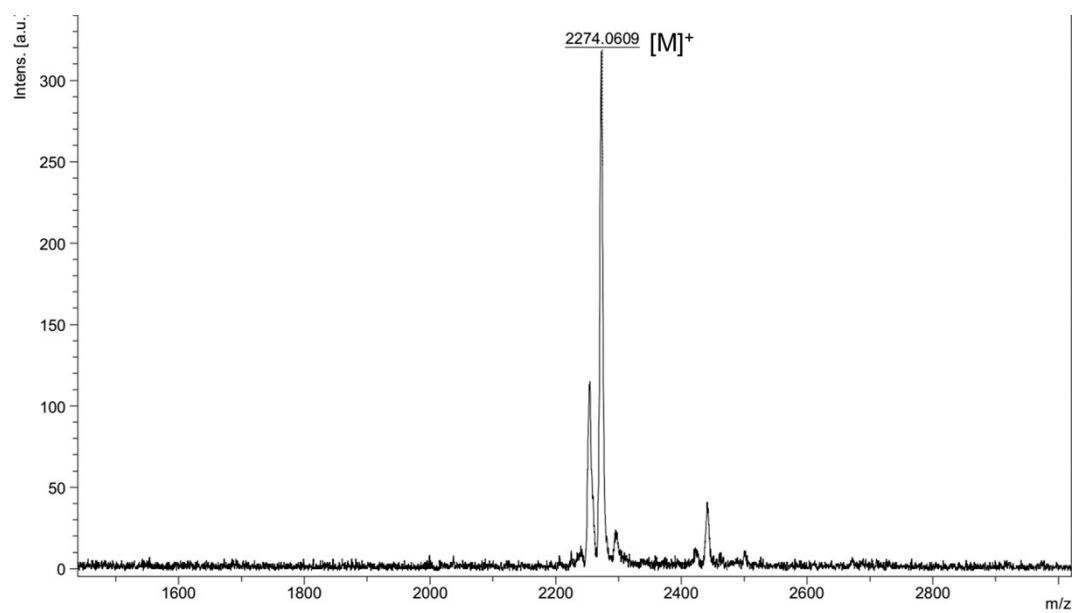

Fig. S7 MALDI-MS spectrum of compound 9.

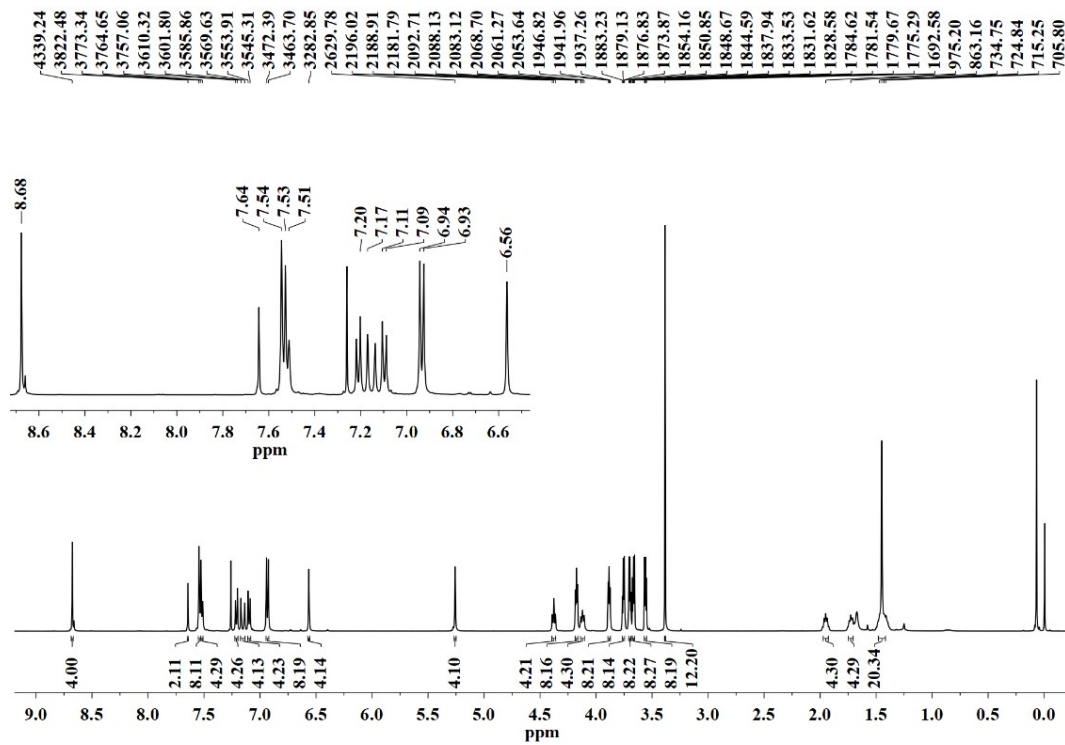

Fig. S8  $^1\text{H}$  NMR spectrum of compound **9**.

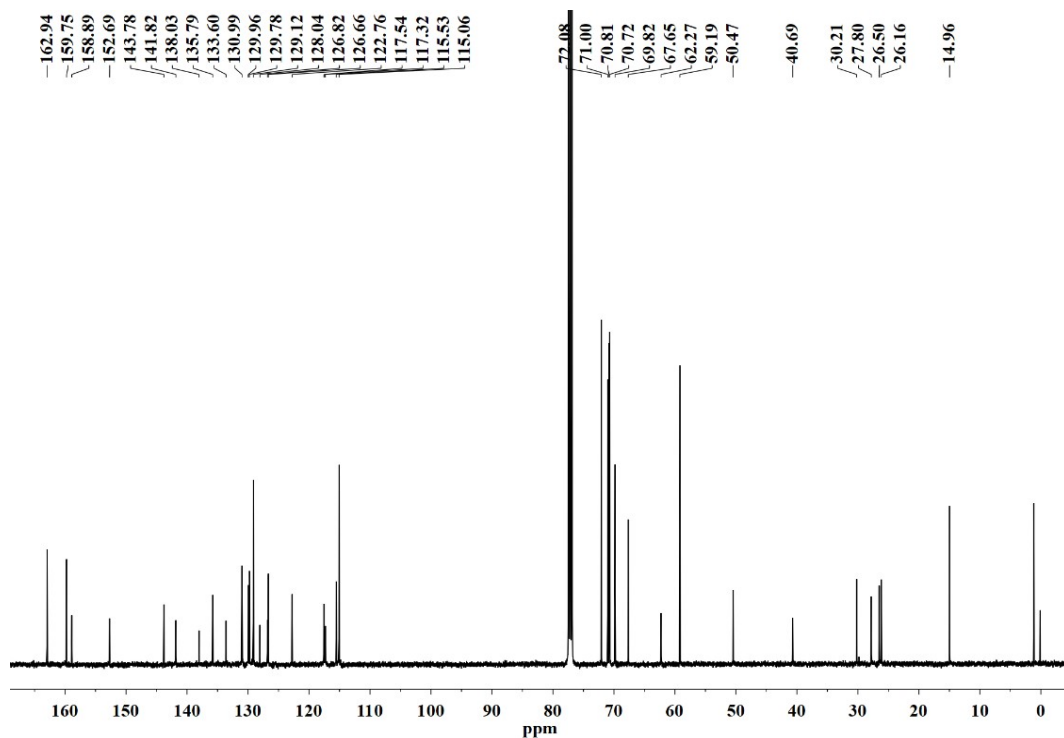

Fig. S9  $^{13}\text{C}$  NMR spectrum of compound **9**.

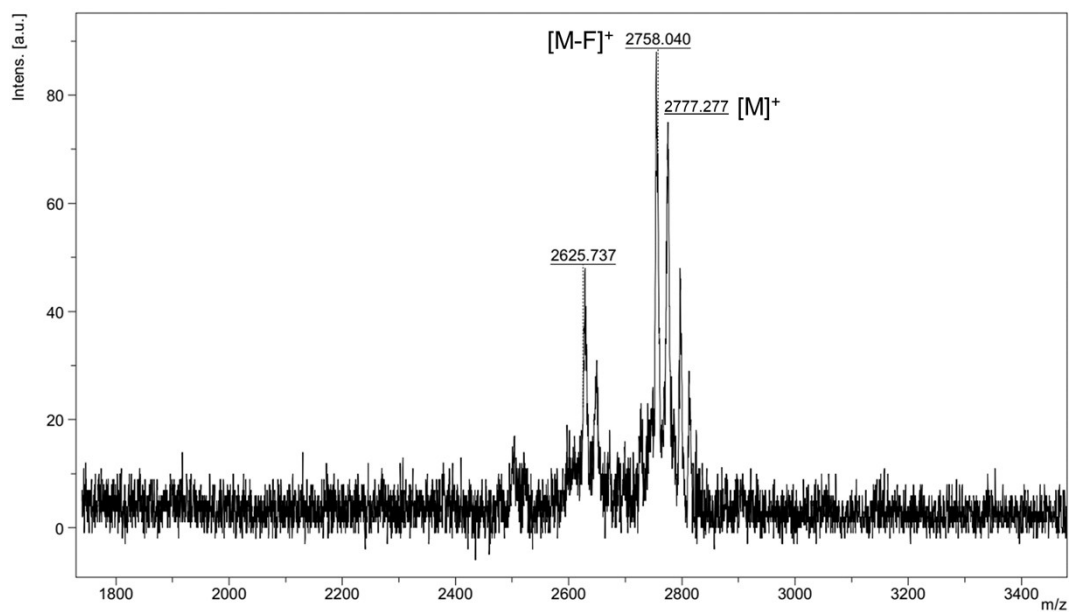

Fig. S10 MALDI-MS spectrum of compound 10.

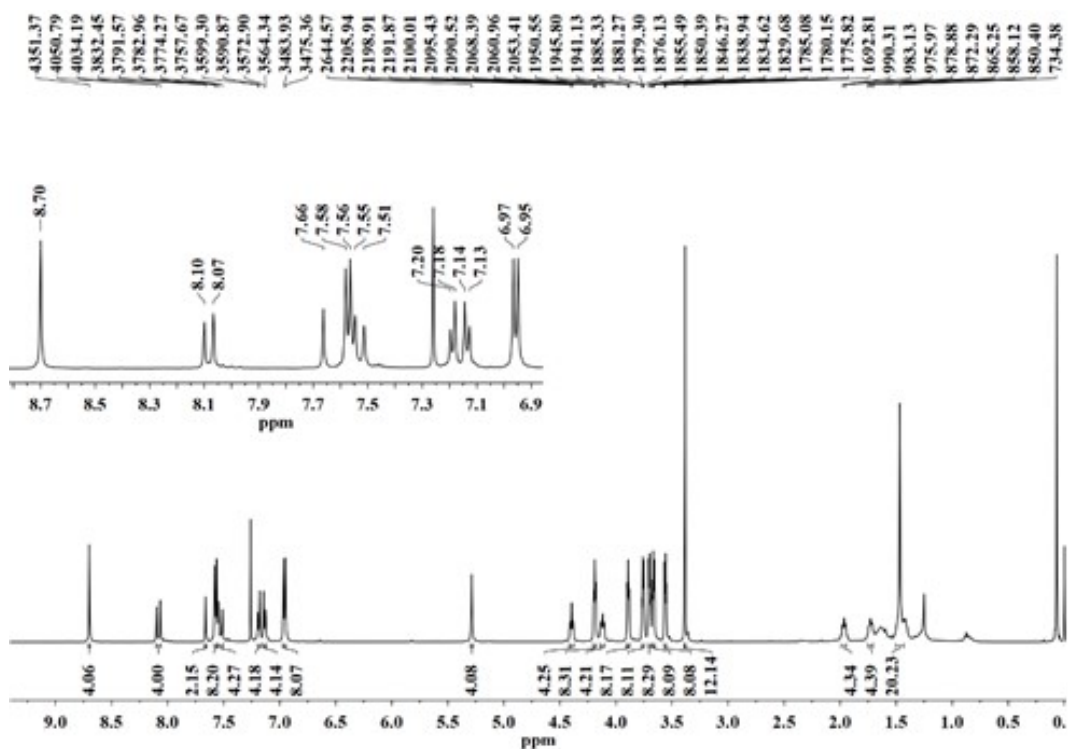

Fig. S11  $^1H$  NMR spectrum of compound 10.

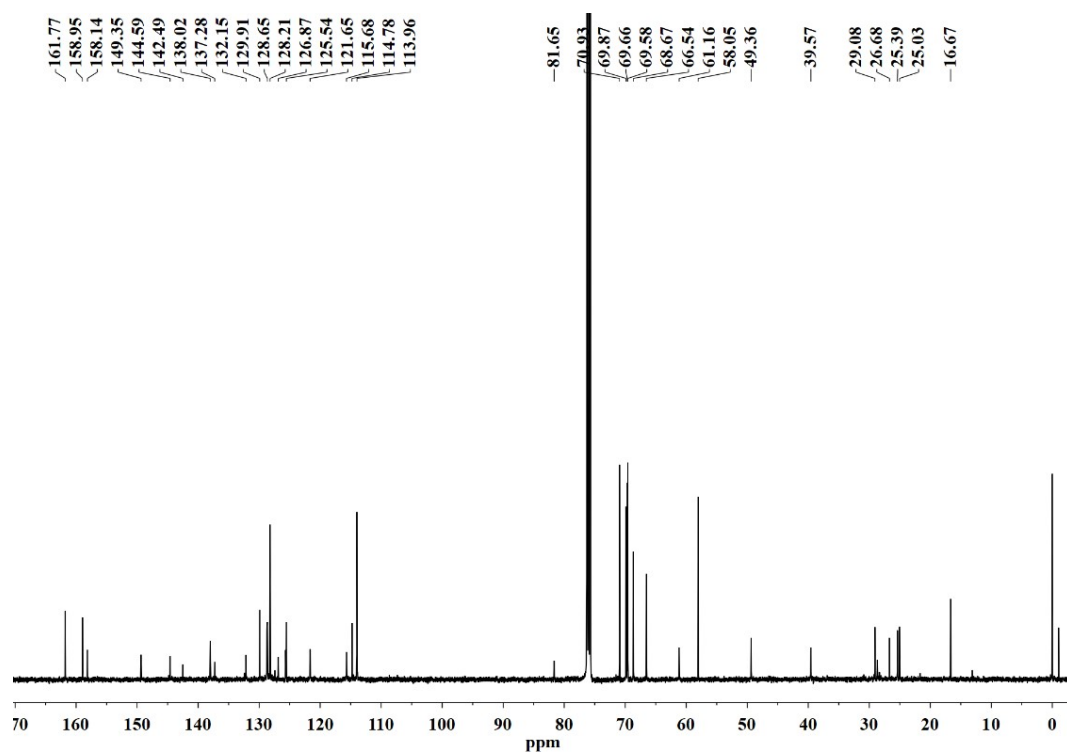

Fig. S12  $^{13}\text{C}$  NMR spectrum of compound 10.

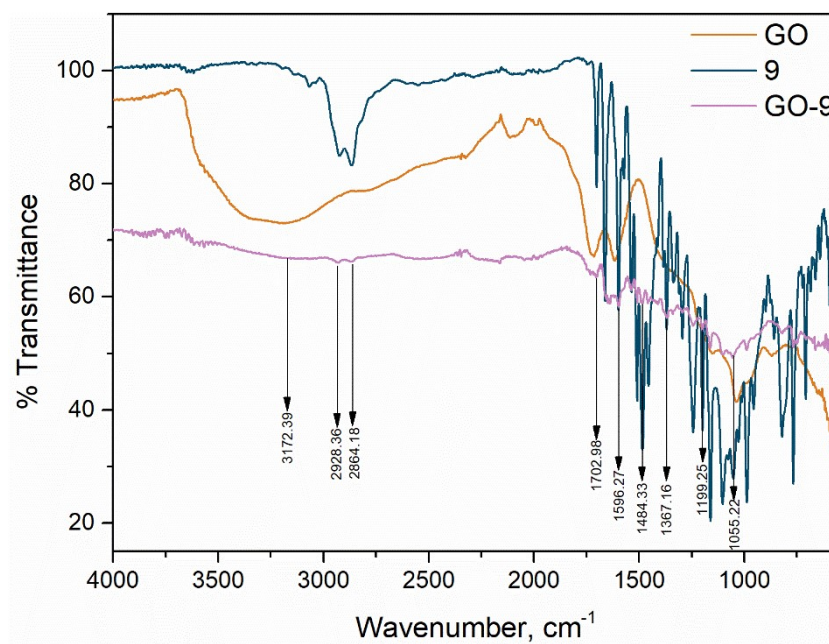

Fig. S13 Overlay FT-IR spectra of GO, compound 9 and GO-9.

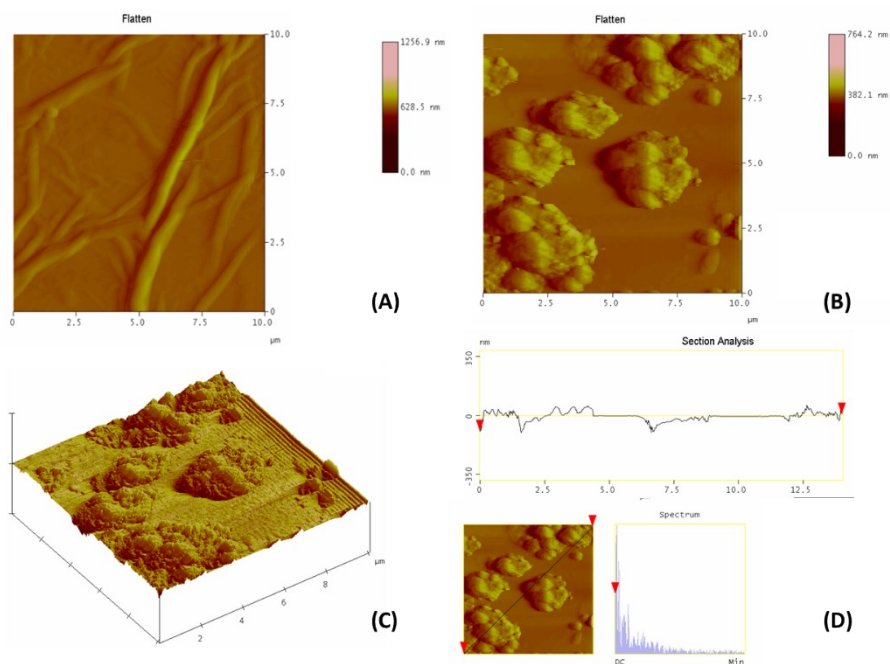

Fig. S14 2D AFM images of (A) **GO** and (B) **GO-9**, (C) 3D AFM image of **GO-9** and (D) cross-sectional analysis of **GO-9**.

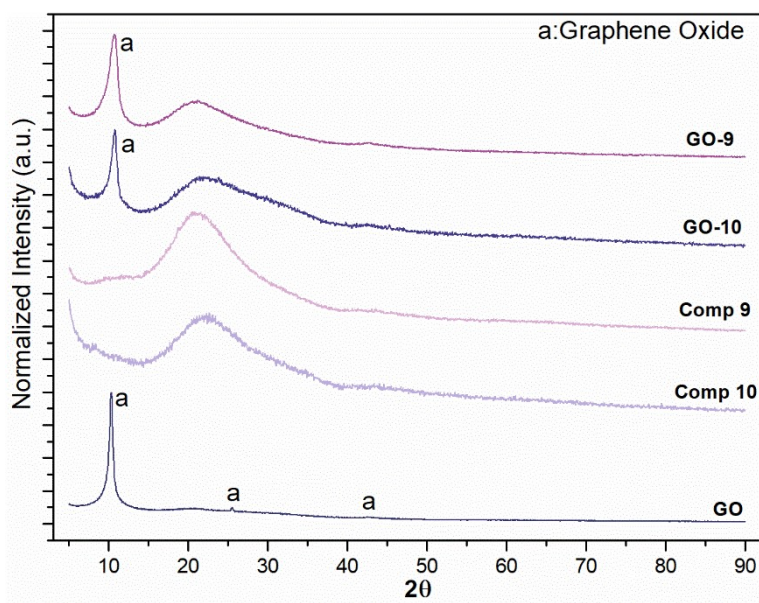

Fig. S15 XRD Diffractogram of **GO**, compounds **9**, **10** and nanocomposites **GO-9** and **GO-10**.



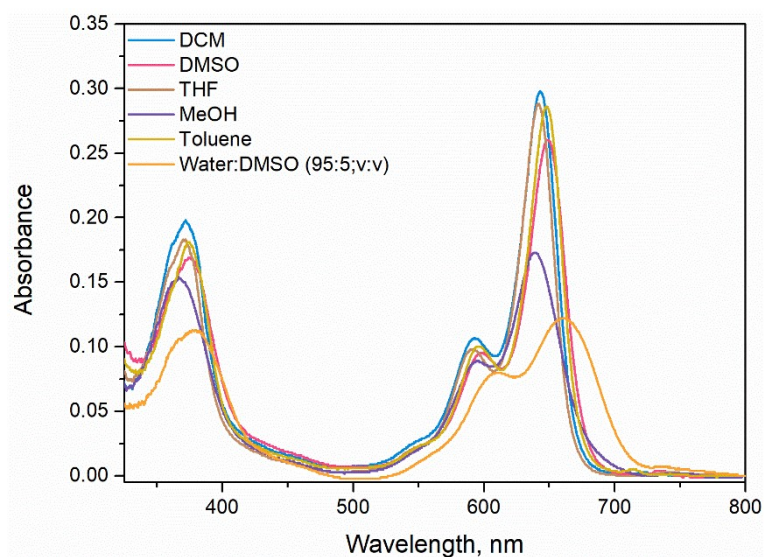

Fig. S16 UV-Vis absorption spectra of compound **9** in different solvents at 1  $\mu\text{M}$ .

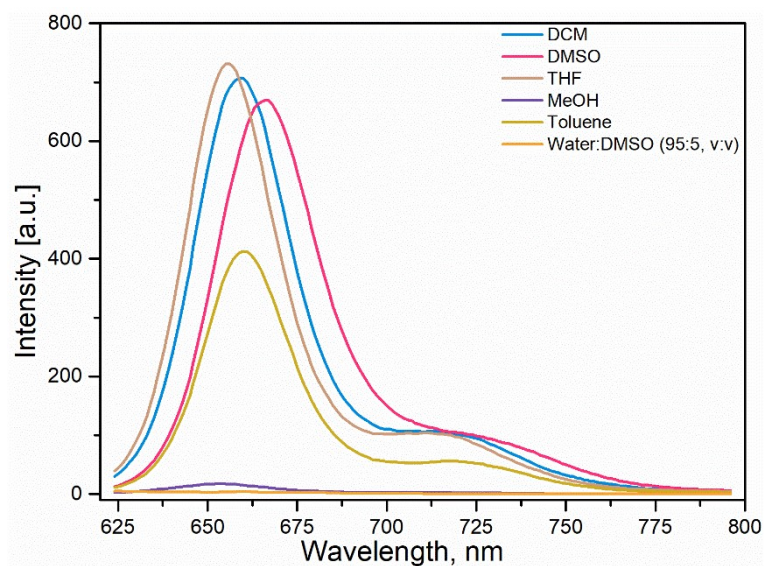

Fig. S17 Fluorescence spectra of compound **9** in different solvents at 1  $\mu\text{M}$  ( $\lambda_{\text{ex}}$ :610nm).

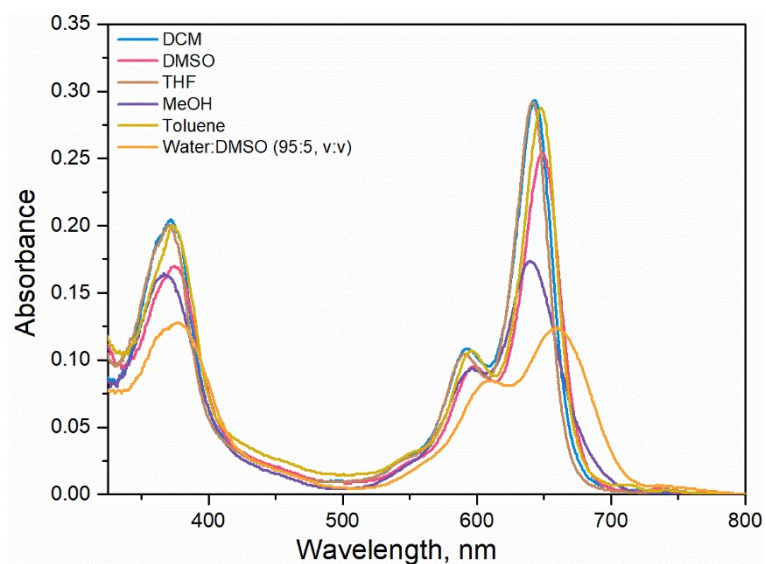

Fig. S18 UV-Vis absorption spectra of **GO-9** in different solvents at 1  $\mu\text{M}$ .

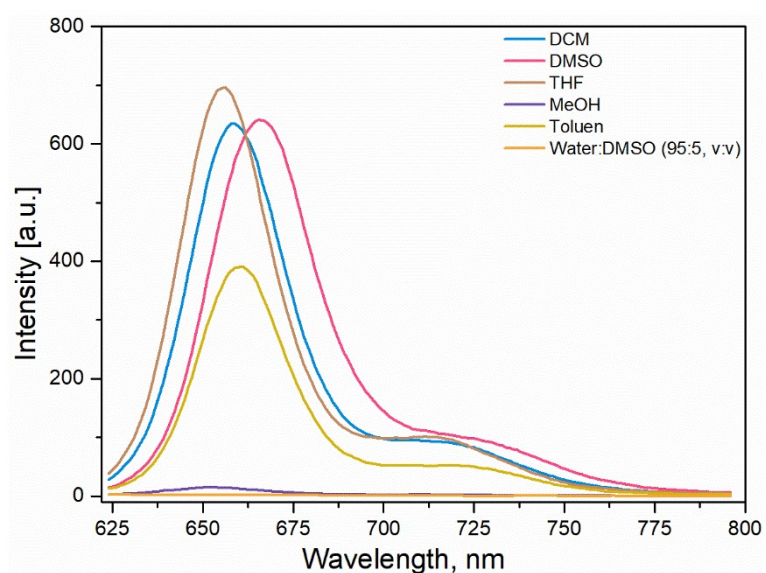

Fig. S19 Fluorescence spectra of **GO-9** in different solvents at 1  $\mu\text{M}$  ( $\lambda_{\text{ex}}$ : 610 nm).

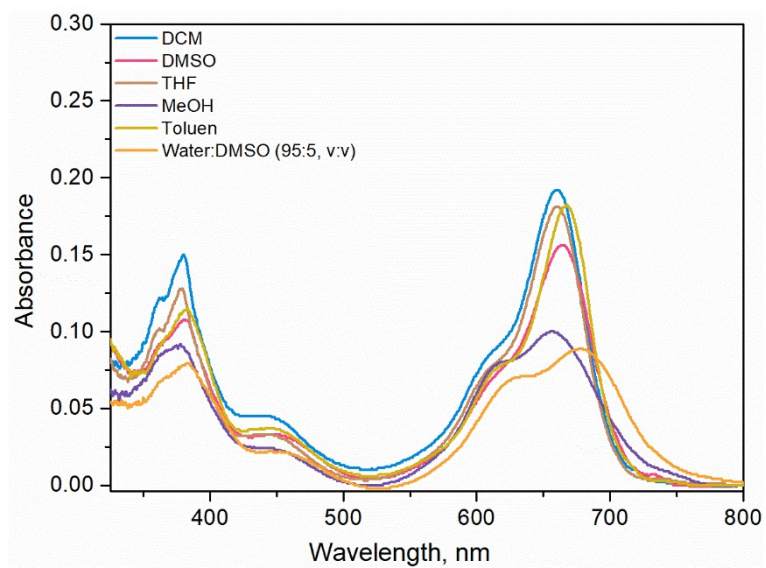

Fig. S20 UV-Vis absorption spectra of compound **10** in different solvents at 1  $\mu\text{M}$ .

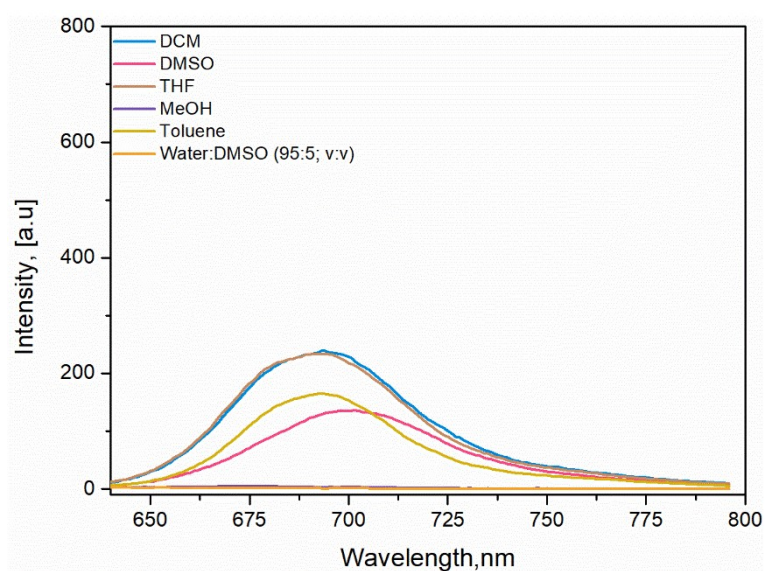

Fig. S21 Fluorescence spectra of compound **10** in different solvents at 1  $\mu\text{M}$  ( $\lambda_{\text{ex}}$ :620nm).

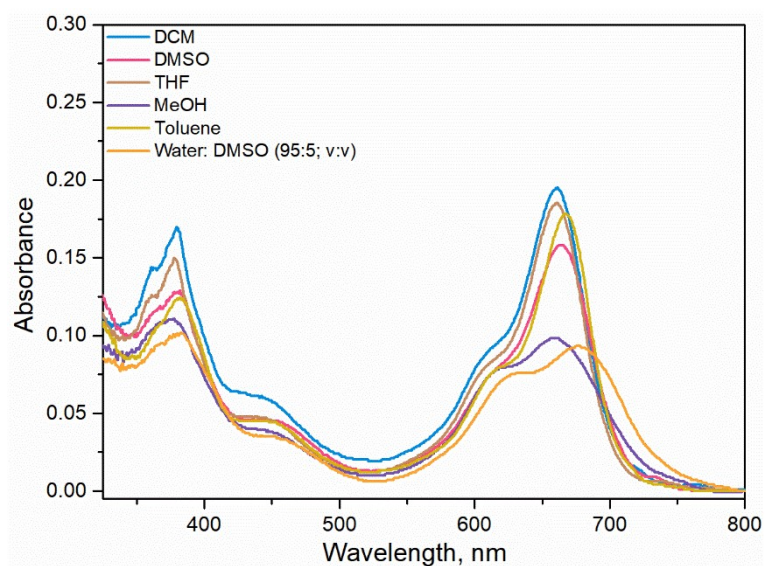

Fig. S22 UV-Vis absorption spectra of **GO-10** in different solvents at 1 μM.

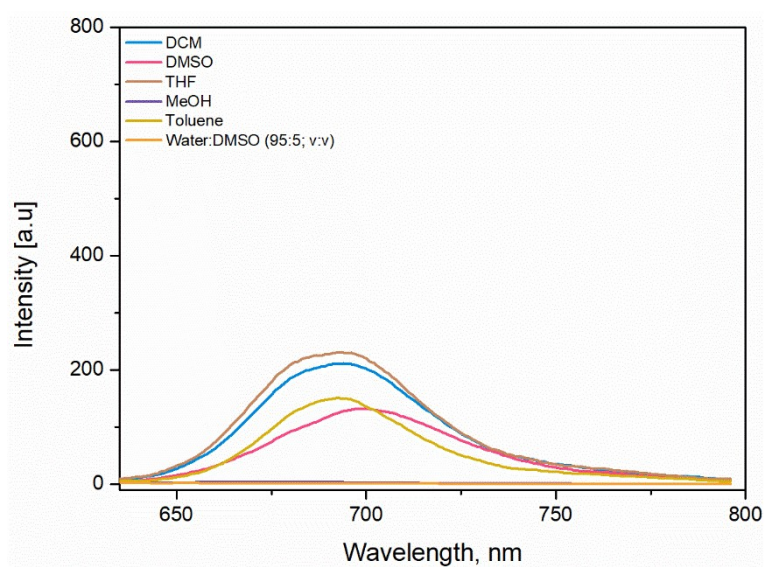

Fig. S23 Fluorescence spectra of **GO-10** in different solvents at 1 μM (λ<sub>ex</sub>: 620 nm).

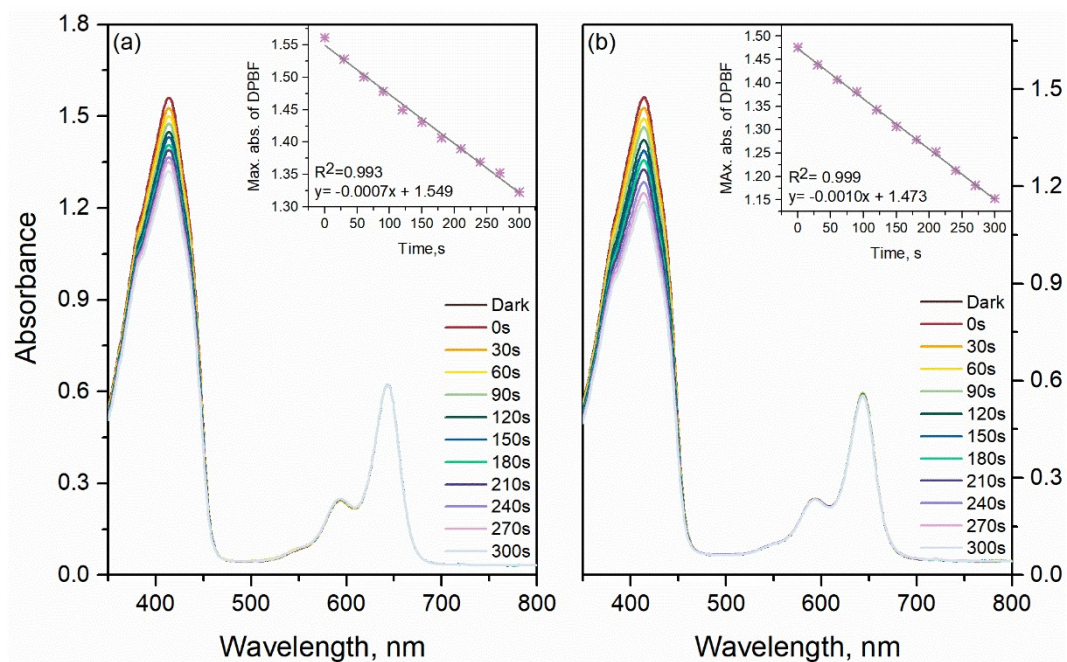

Fig. S24 Absorbance decrease of DPBF in the presence of 2  $\mu\text{M}$  a) compound **9** and b) **GO-9**.

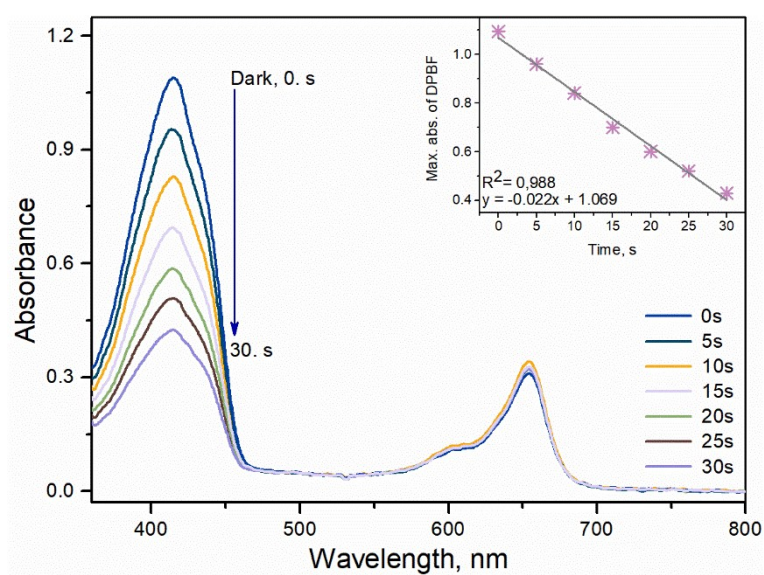

Fig. S25 Absorbance decrease of DPBF in the presence of 2  $\mu\text{M}$  methylene blue.

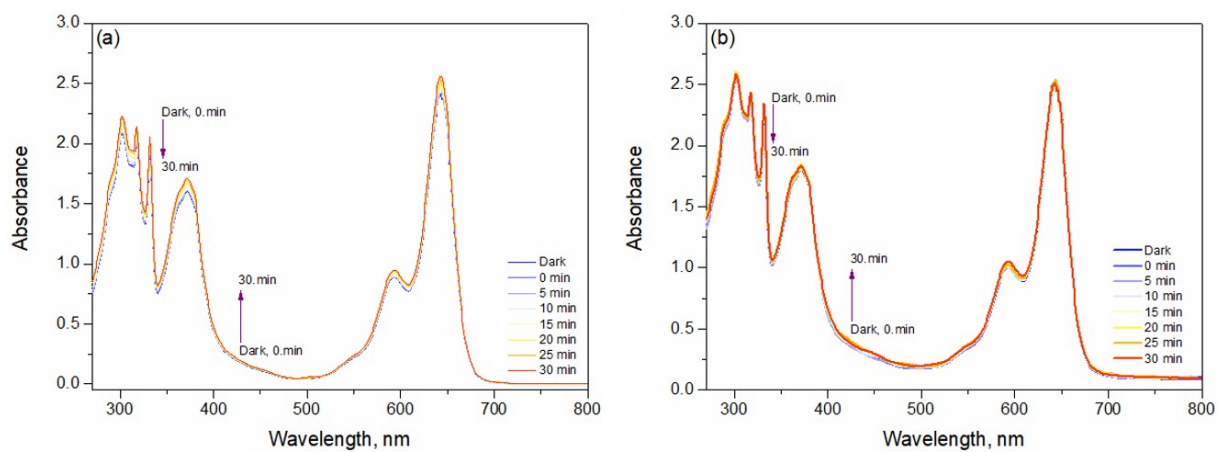

Fig. S26 UV-vis absorption spectra of a) **9** and b) **GO-9** containing DHN

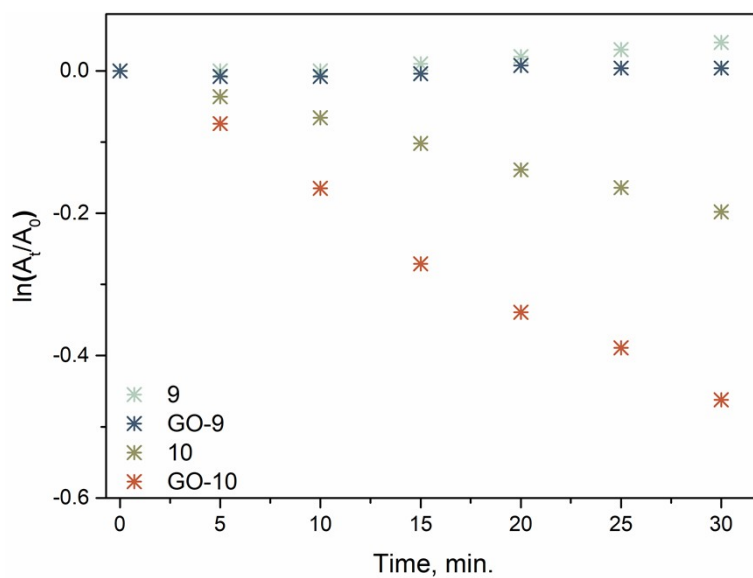

Fig. S27 Plots of  $\ln(A_t/A_0)$  vs. irradiation time ( $t$ ) for the photooxidation of DHN.

**Table S1.** <sup>1</sup>H NMR Parameters of compounds 7-10.

|    | N-CH         | Ar-CH                                                                                                                                                                                                                                                | <i>trans</i> -CH                                                                                                                     | pyrrole-CH   | -NCH <sub>2</sub>                                                                                                                  | H <sub>2</sub> C≡C                | -OCH <sub>2</sub>                                                                                                                                                                                                                                                              | -OCH <sub>3</sub> | C≡CH                              | -CH <sub>2</sub> -                                                                                                                 | -CH <sub>3</sub> |
|----|--------------|------------------------------------------------------------------------------------------------------------------------------------------------------------------------------------------------------------------------------------------------------|--------------------------------------------------------------------------------------------------------------------------------------|--------------|------------------------------------------------------------------------------------------------------------------------------------|-----------------------------------|--------------------------------------------------------------------------------------------------------------------------------------------------------------------------------------------------------------------------------------------------------------------------------|-------------------|-----------------------------------|------------------------------------------------------------------------------------------------------------------------------------|------------------|
| 7  | -            | <ul style="list-style-type: none"> <li>• 7.56 (d, 4H)<br/><i>J</i>= 8.7 Hz</li> <li>• 7.23 (d, 2H)<br/><i>J</i>= 8.7 Hz</li> <li>• 7.09 (d, 2H)<br/><i>J</i>= 8.7 Hz</li> <li>• 6.94 (d,4H),<br/><i>J</i>= 8.8 Hz</li> </ul>                         | <ul style="list-style-type: none"> <li>• 7.60 (d, 2H)<br/><i>J</i>= 14.8 Hz</li> <li>• 7.19 (d, 2H)<br/><i>J</i>= 16.4 Hz</li> </ul> | 6.60 (s, 2H) | -                                                                                                                                  | 4.76 (d, 2H)<br><i>J</i> = 2.4 Hz | <ul style="list-style-type: none"> <li>• 4.17 (t, 4H)<br/><i>J</i>= 4.8 Hz</li> <li>• 3.88 (t, 4H)<br/><i>J</i>= 4.8 Hz</li> <li>• 3.76-3.74 (m, 4H)</li> <li>• 3.71-3.69 (m, 4H)</li> <li>• 3.68-3.65 (m, 4H)</li> <li>• 3.57-3.55 (m, 4H)</li> </ul>                         | 3.39 (s, 6H)      | 2.56 (t, 1H)<br><i>J</i> = 2.4 Hz | -                                                                                                                                  | 1.47 (s, 6H)     |
| 8  | -            | <ul style="list-style-type: none"> <li>• 7.60 (d, 4H)<br/><i>J</i>= 8.7 Hz</li> <li>• 7.20 (d, 2H)<br/><i>J</i>= 8.7 Hz</li> <li>• 7.12 (d, 2H)<br/><i>J</i>= 8.7 Hz</li> <li>• 6.96 (d, 4H)<br/><i>J</i>= 8.7 Hz</li> </ul>                         | <ul style="list-style-type: none"> <li>• 8.13 (d, 2H)<br/><i>J</i>= 16.6 Hz</li> <li>• 7.58 (d, 2H)<br/><i>J</i>= 16.7 Hz</li> </ul> | -            | -                                                                                                                                  | 4.79 (d, 2H)<br><i>J</i> = 2.4 Hz | <ul style="list-style-type: none"> <li>• 4.19 (t, 4H)<br/><i>J</i>= 4.8 Hz,</li> <li>• 3.89 (t, 4H)<br/><i>J</i>= 4.8 Hz</li> <li>• 3.77-3.75 (m, 4H)</li> <li>• 3.71- 3.69 (m,4H)</li> <li>• 3.68-3.66 (m, 4H)</li> <li>• 3.57-3.55 (m, 4H)</li> </ul>                        | 3.39 (s, 6H)      | 2.58 (t, 1H)<br><i>J</i> = 2.4 Hz | -                                                                                                                                  | 1.49 (s, 6H)     |
| 9  | 7.64 (s, 2H) | <ul style="list-style-type: none"> <li>• 8.68 (s, 4H)</li> <li>• 7.53 (d, 8H)<br/><i>J</i>= 8.7 Hz</li> <li>• 7.21 (d, 4H)<br/><i>J</i>= 8.5 Hz</li> <li>• 7.10 (d, 4H)<br/><i>J</i>= 8.6 Hz</li> <li>• 6.93 (d, 8H)<br/><i>J</i>= 8.7 Hz</li> </ul> | <ul style="list-style-type: none"> <li>• 7.52 (d, 4H)<br/><i>J</i>= 16.3 Hz</li> <li>• 7.15 (d, 4H)<br/><i>J</i>= 16.2 Hz</li> </ul> | 6.56 (s, 4H) | <ul style="list-style-type: none"> <li>• 4.38 (t, 4H)<br/><i>J</i>= 7.1 Hz</li> <li>• 4.12 (t, 4H)<br/><i>J</i>= 7.5 Hz</li> </ul> | -                                 | <ul style="list-style-type: none"> <li>• 5.26 (s, 4H)</li> <li>• 4.17 (t, 8H)<br/><i>J</i>= 4.8 Hz</li> <li>• 3.88 (t, 8H)<br/><i>J</i>= 4.8 Hz</li> <li>• 3.76-3.74 (m, 8H)</li> <li>• 3.71-3.69 (m, 8H)</li> <li>• 3.67-3.66 (m, 8H)</li> <li>• 3.57-3.55 (m, 8H)</li> </ul> | 3.38 (s, 12H)     | -                                 | <ul style="list-style-type: none"> <li>• 1.95 (q, 4H)<br/><i>J</i>= 7.2 Hz</li> <li>• 1.73 (q, 4H)<br/><i>J</i>= 7.4 Hz</li> </ul> | 1.45 (m, 20H)    |
| 10 | 7.66 (s, 2H) | <ul style="list-style-type: none"> <li>• 8.70 (s, 4H)</li> <li>• 7.57 (d, 8H)<br/><i>J</i>= 8.6 Hz</li> <li>• 7.19 (d, 4H)<br/><i>J</i>= 8.4 Hz</li> <li>• 7.14 (d, 4H)<br/><i>J</i>= 8.6 Hz</li> <li>• 6.96 (d, 8H)<br/><i>J</i>= 8.6 Hz</li> </ul> | <ul style="list-style-type: none"> <li>• 8.08 (d, 4H)<br/><i>J</i>= 16.6 Hz</li> <li>• 7.53 (d, 4H)<br/><i>J</i>= 16.6 Hz</li> </ul> | -            | <ul style="list-style-type: none"> <li>• 4.40 (t, 4H)<br/><i>J</i>= 7.0 Hz</li> <li>• 4.12 (t, 4H)<br/><i>J</i>= 7.5 Hz</li> </ul> | -                                 | <ul style="list-style-type: none"> <li>• 5.29 (s, 4H)</li> <li>• 4.19 (t, 8H)<br/><i>J</i>= 4.7 Hz</li> <li>• 3.89 (t, 8H)<br/><i>J</i>= 4.7 Hz</li> <li>• 3.77-3.75 (m, 8H)</li> <li>• 3.71-3.69 (m, 8H)</li> <li>• 3.68-3.65 (m, 8H)</li> <li>• 3.57-3.55 (m, 8H)</li> </ul> | 3.38 (s, 12H)     | -                                 | <ul style="list-style-type: none"> <li>• 1.96 (q, 4H)<br/><i>J</i>= 7.1 Hz</li> <li>• 1.73 (q, 4H)<br/><i>J</i>= 7.1 Hz</li> </ul> | 1.47 (m, 20H)    |

**Table S2.** FT-IR Parameters of **9**, **10**, **GO-9** and **GO-10**.

| Compound     | $\nu_{\text{O-H}}$ | $\nu_{\text{C-H(str)}}$ | $\nu_{\text{C=O(str)}}$ | $\nu_{\text{C=C(str)}}$ | $\nu_{\text{B-N(str)}}$ | $\nu_{\text{C-H(bnd)}}$ | $\nu_{\text{C-N(str)}}$ | $\nu_{\text{C-O(str)}}$ |
|--------------|--------------------|-------------------------|-------------------------|-------------------------|-------------------------|-------------------------|-------------------------|-------------------------|
| <b>9</b>     | -                  | 2931.34;<br>2865.67     | 1711.94                 | 1596.24                 | 1482.84                 | 1370.89                 | 1197.01                 | 1052.98                 |
| <b>10</b>    | -                  | 2923.13;<br>2863.43     | 1701.49                 | 1661.19,<br>1596.27     | 1508.95                 | -                       | 1243.28                 | 1100.75                 |
| <b>GO-9</b>  | 3172.39            | 2928.36;<br>2864.18     | 1702.98                 | 1596.27                 | 1484.33                 | 1367.16                 | 1199.25                 | 1055.22                 |
| <b>GO-10</b> | 3161.94            | 2926.86;<br>2864.92     | 1703.73                 | 1644.03;<br>1597.76     | 1507.46                 | -                       | 1241.04                 | 1097.01                 |
